# Supplementary material for: Crystal structure dependence of the microstructure and microwave dielectric properties of (SrxCa1−x)(Zr0.95Ti0.05)O3 (0 ≤ x ≤ 1) perovskite ceramics
Source: Royal Society of Chemistry journal article supplement (doi:10.1039/d2tc03756d), 2022-01-01
Supplement: d2tc03756d1.pdf [file d2tc03756d1.pdf]

Table 1

Lattice parameters and theoretic density of  $(\text{Sr}_x\text{Ca}_{1-x})(\text{Zr}_{0.95}\text{Ti}_{0.05})\text{O}_3$  ( $0 \leq x \leq 1$ ) ceramics.

| x    | Phase        | a (Å)  | b (Å)  | c (Å)  | V ( $10^{-24}\text{cm}^3$ ) | $\rho_{\text{theo}}$ ( $\text{g}/\text{cm}^3$ ) |
|------|--------------|--------|--------|--------|-----------------------------|-------------------------------------------------|
| 0    | Orthorhombic | 5.7457 | 7.9970 | 5.5789 | 256.344                     | 4.5897                                          |
| 0.10 | Orthorhombic | 5.7514 | 8.0198 | 5.6035 | 258.461                     | 4.6743                                          |
| 0.25 | Orthorhombic | 5.7562 | 8.0519 | 5.6393 | 261.373                     | 4.8034                                          |
| 0.40 | Orthorhombic | 5.7648 | 8.0803 | 5.6693 | 264.087                     | 4.9334                                          |
| 0.55 | Orthorhombic | 5.7752 | 8.1085 | 5.6978 | 266.815                     | 5.0605                                          |
|      | Cubic        | 4.0788 |        |        | 67.868                      | 4.9746                                          |
| 0.70 | Orthorhombic | 5.7845 | 8.1338 | 5.7279 | 269.502                     | 5.1859                                          |
|      | Cubic        | 4.0682 |        |        | 67.331                      | 5.1893                                          |
| 0.85 | Orthorhombic | 5.7932 | 8.1616 | 5.7572 | 272.213                     | 5.3082                                          |
|      | Cubic        | 4.0942 |        |        | 68.631                      | 5.2648                                          |
| 1.00 | Orthorhombic | 5.7826 | 8.1860 | 5.8021 | 274.652                     | 5.4336                                          |
|      | Cubic        | 4.0971 |        |        | 68.773                      | 5.4248                                          |

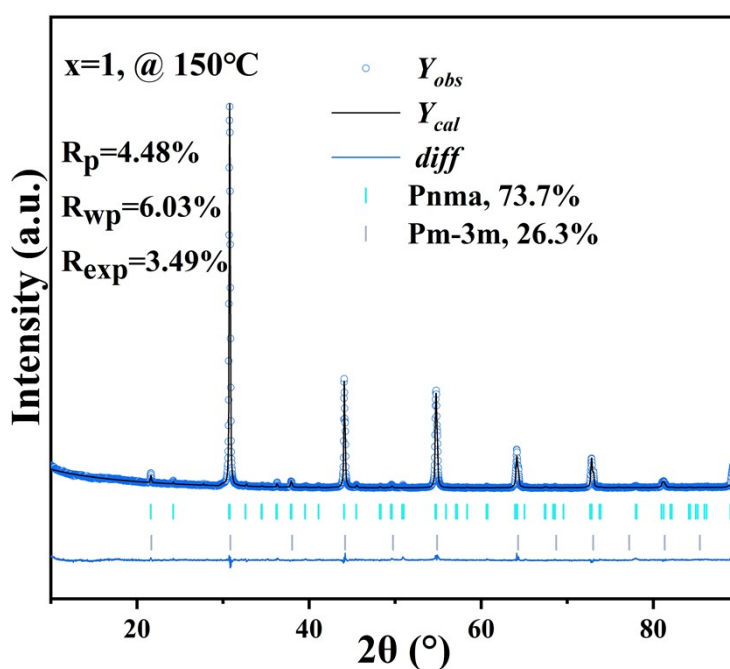

Fig. S1. Representative Rietveld refinement results with experimental (blue circles) and calculated (black line) X-ray powder diffraction profiles for the  $\text{Sr}(\text{Zr}_{0.95}\text{Ti}_{0.05})\text{O}_3$  ( $x = 1$ ) ceramics at  $150^\circ\text{C}$ . The short vertical lines below the patterns mark the positions of Bragg reflections. The bottom continuous line is the differences between the observed and the calculated intensity. “R” values ( $R_p$ ,  $R_{wp}$ , and  $R_{exp}$ ) relate to the goodness of fit.

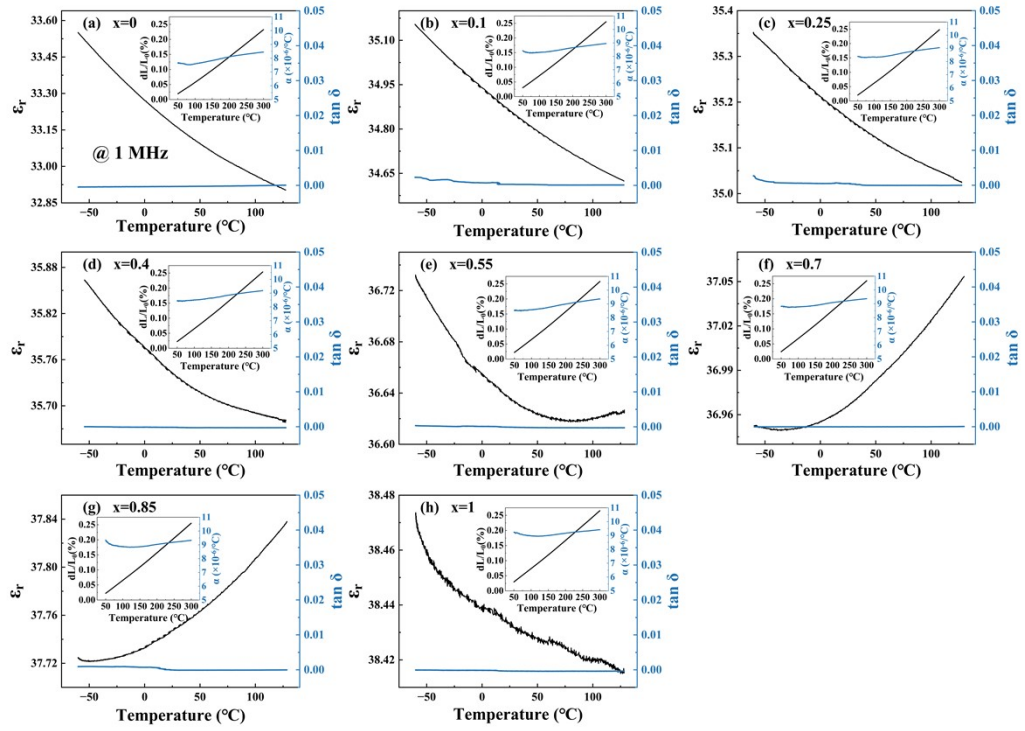

Fig. S2. Temperature dependence of dielectric properties (1MHz) of  $(\text{Sr}_x\text{Ca}_{1-x})(\text{Zr}_{0.95}\text{Ti}_{0.05})\text{O}_3$  ( $0 \leq x \leq 1$ ) ceramics. The insets are thermal expansion coefficient.
